# Supplementary material for: Extracellular vesicles produced by irradiated endothelial or Glioblastoma stem cells promote tumor growth and vascularization modulating tumor microenvironment
Source: PubMed Central journal article supplement (PMC10863174; doi:10.1186/s12935-024-03253-0), 2024-02-12
Supplement: 12935_2024_3253_MOESM1_ESM.pdf [file 12935_2024_3253_MOESM1_ESM.pdf]

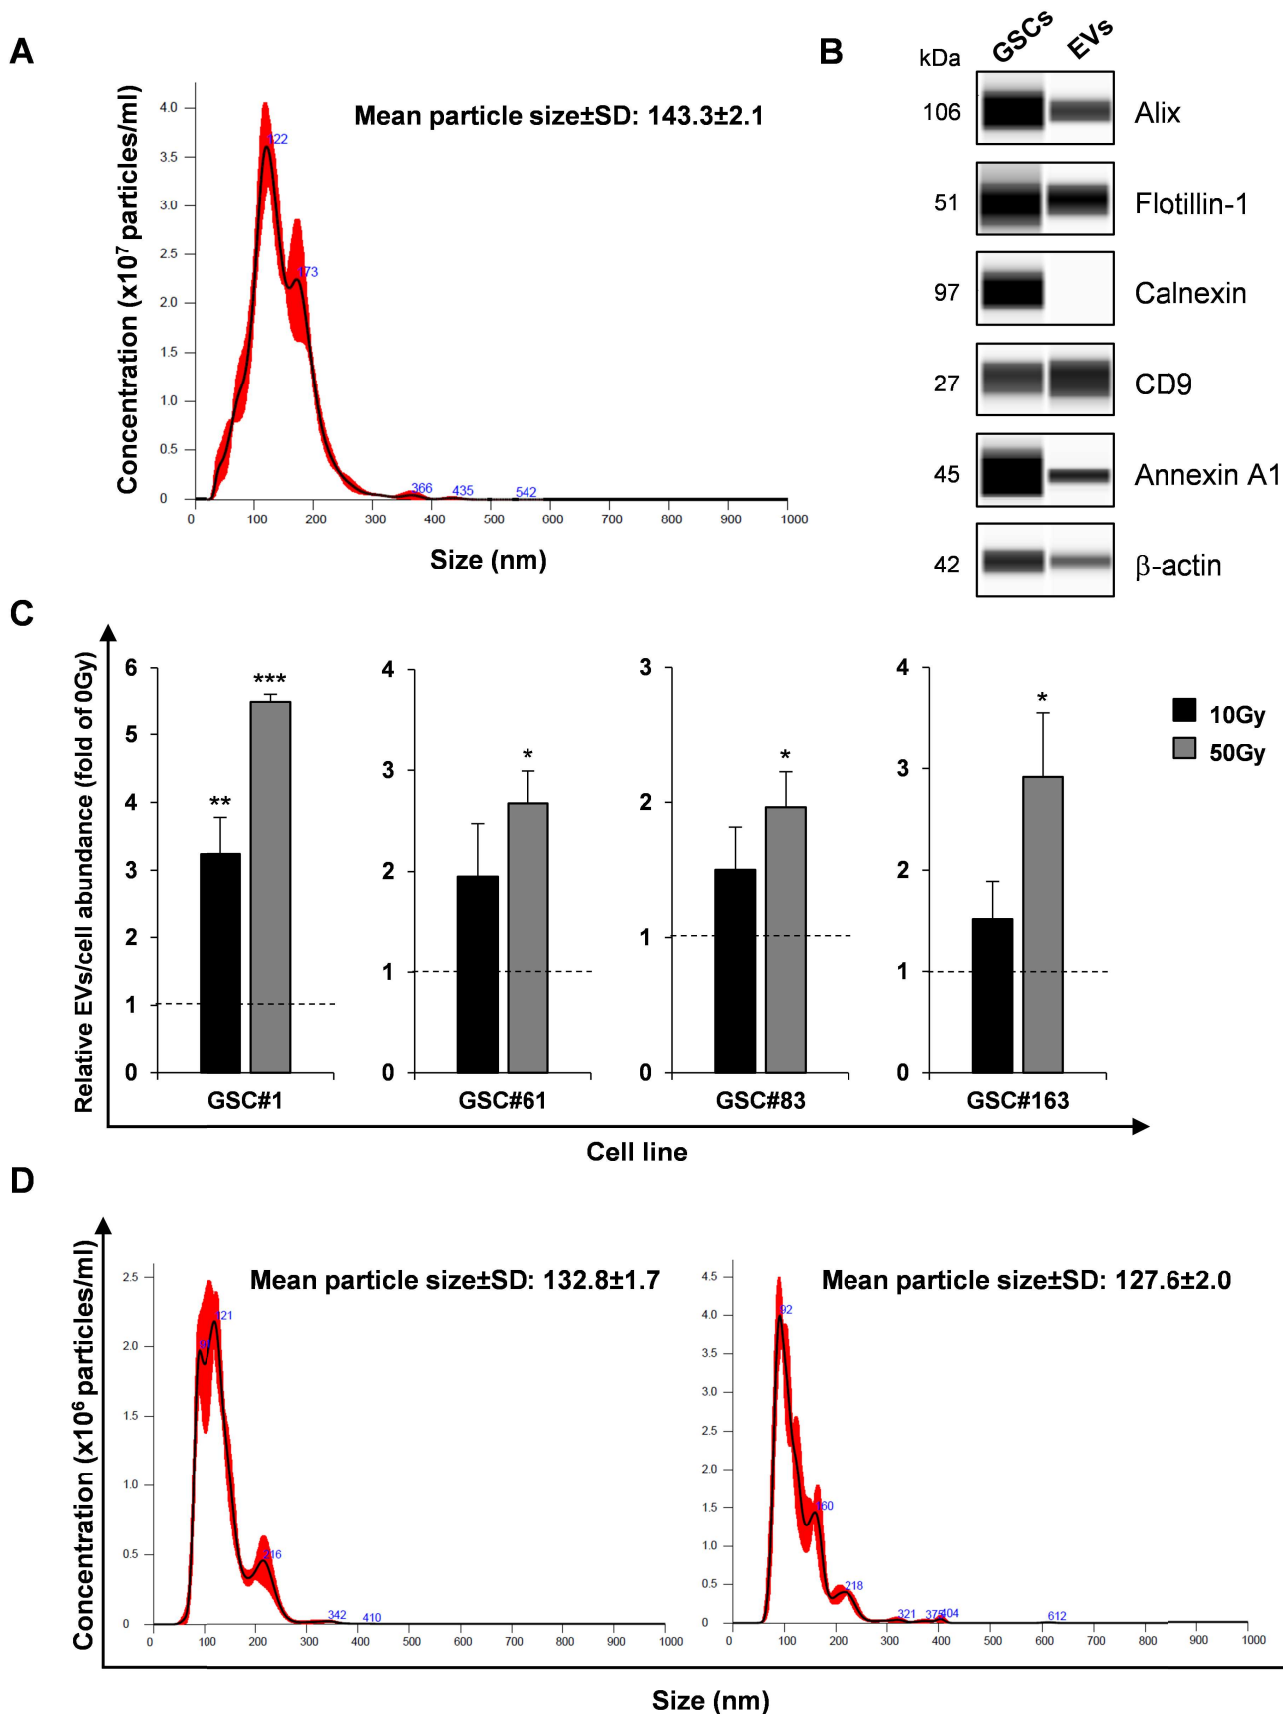

**Additional file 1: Figure S1. Characterization of GSC-derived EVs.** **A.** Size distribution of GSC-derived EVs analyzed by the Nanosight™ technology. **B.** WES full-length gel image of EV marker and  $\beta$ -actin expression in GSCs and GSC-derived EVs. Calnexin was used as a negative control. **C.** Measurement of EVs/cell released by irradiated GSCs (10Gy and 50Gy) relative to sham irradiated cells, used as control (0Gy, dashed line at value 1). Four GSC lines (i.e. GSC#1, #61, #83 and #163) isolated from different GBM patients are shown. Results are reported as mean  $\pm$  SD ( $n = 3$ ). \* $p < 0.05$ ; \*\* $p < 0.01$ ; \*\*\* $p < 0.001$  vs sham irradiated cells (Student's t test). **D.** Size distribution of GSC-derived EVs (*left*, sham irradiated GSC-derived EVs; *right*, 50Gy-irradiated GSC-derived EVs).
