# Supplementary material for: Extracellular vesicles produced by irradiated endothelial or Glioblastoma stem cells promote tumor growth and vascularization modulating tumor microenvironment
Source: PubMed Central journal article supplement (PMC10863174; doi:10.1186/s12935-024-03253-0), 2024-02-12
Supplement: 12935_2024_3253_MOESM3_ESM.pdf [file 12935_2024_3253_MOESM3_ESM.pdf]

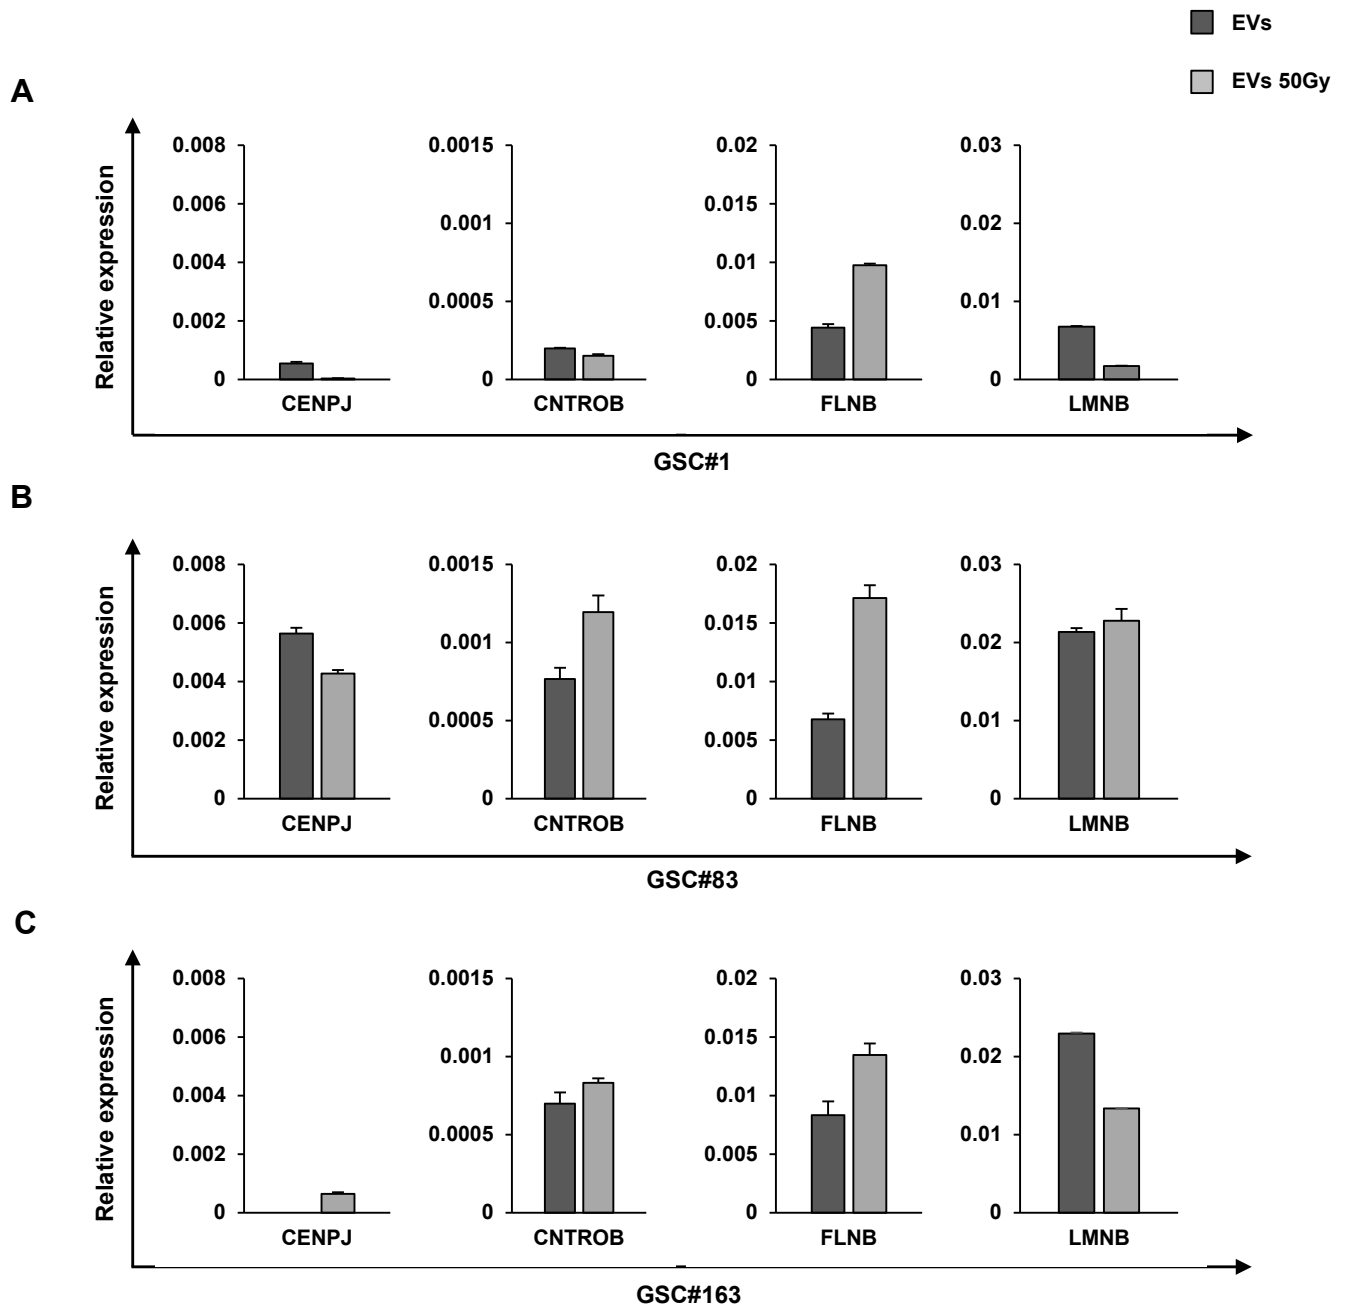

**Additional file 3: Figure S2. Validation by qRT-PCR of enriched transcripts in EVs isolated after irradiation from GSC lines. A-C.** qRT-PCR analysis of CENPJ, CNTROB, FLNB and LMNB in GSC-derived EVs isolated from GSC#1 (A), GSC#83 (B) and GSC#163 (C). EVs were isolated from sham irradiated (EVs) and irradiated cells (EVs 50Gy). Samples were run in duplicate. Data were normalized to the GAPDH expression in the corresponding samples.
