# Supplementary material for: Extracellular vesicles produced by irradiated endothelial or Glioblastoma stem cells promote tumor growth and vascularization modulating tumor microenvironment
Source: PubMed Central journal article supplement (PMC10863174; doi:10.1186/s12935-024-03253-0), 2024-02-12
Supplement: 12935_2024_3253_MOESM5_ESM.pdf [file 12935_2024_3253_MOESM5_ESM.pdf]

**A**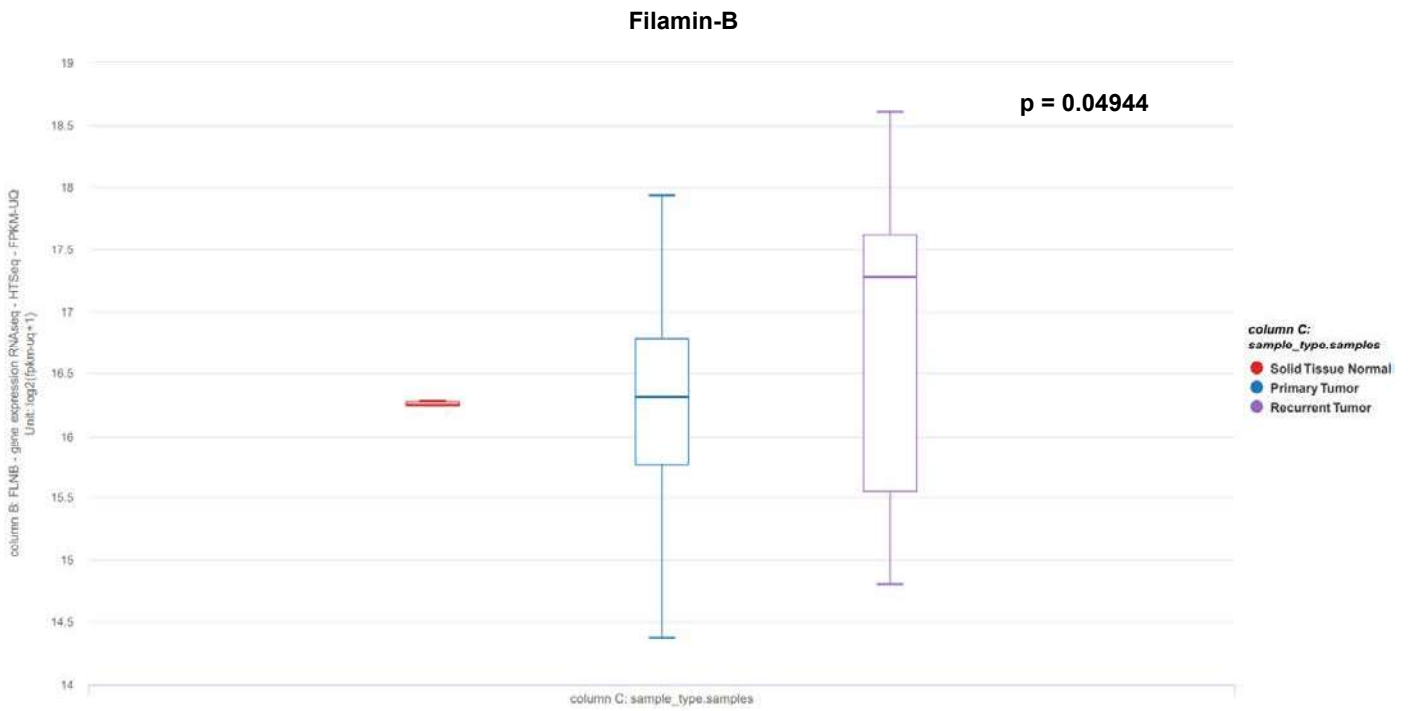**B**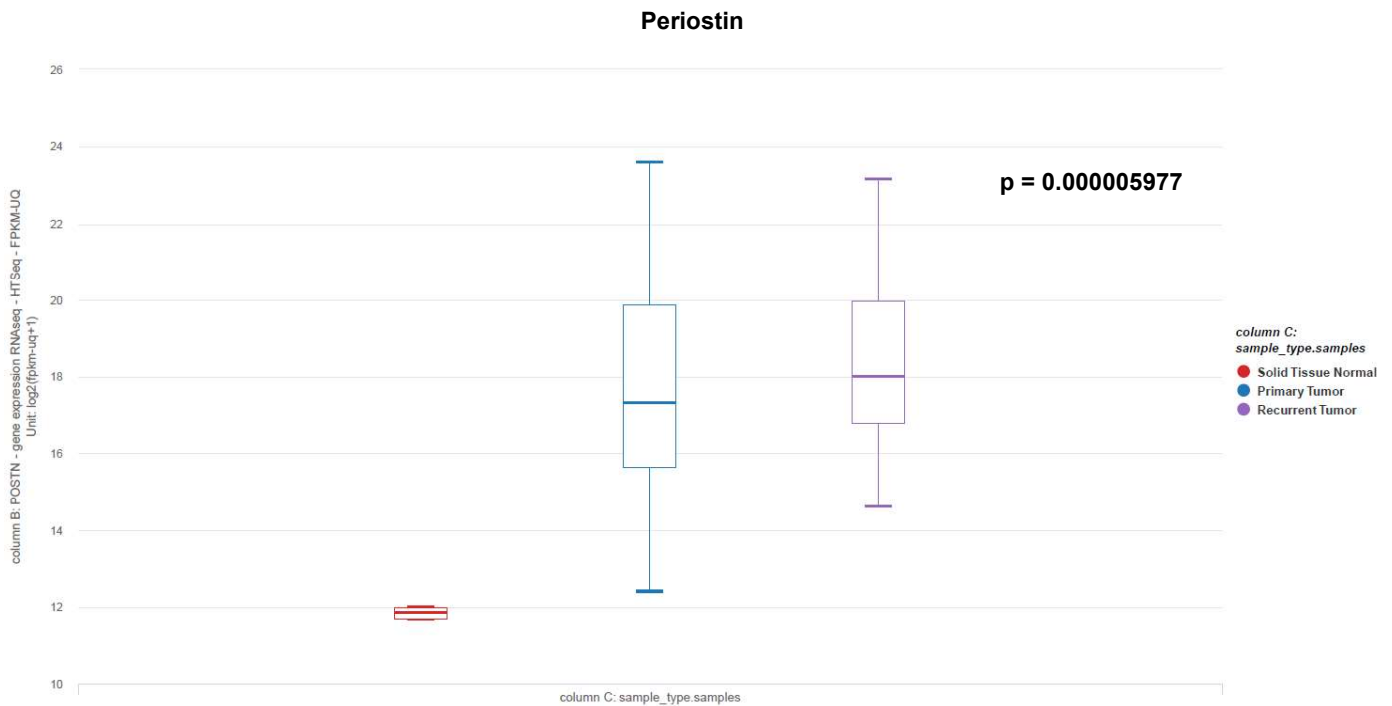

**Additional file 5: Figure S4. Filamin-B and Periostin expression increases in recurrent GBM patients.** Box plot showing the expression of FLNB (**A**) and POSTN (**B**) in GBM clinical samples (<https://xena.ucsc.edu/>), GDC TCGA GBM dataset (n=671 samples). Significance (p values) were evaluated by One-way ANOVA.
